# Supplementary material for: Ligand complex structures of l‐amino acid oxidase/monooxygenase from Pseudomonas sp. AIU 813 and its conformational change
Source: PubMed Central journal article supplement (PMC5832979; doi:10.1002/2211-5463.12387), 2018-02-08
Supplement: FEB4-8-314-s001.pdf [file FEB4-8-314-s001.pdf]

## Supporting information

**Table S1.** Primers used in the present study

| Name | Sequence                                                    | Objective                          |
|------|-------------------------------------------------------------|------------------------------------|
| P1   | 5'-GGT GGT TGG GAT TCG <b>GCG</b> TTC CCC AAC<br>TCG ATG-3' | Site-directed mutagenesis of D238A |
| P2   | 5'-CAT CGA GTT GGG GAA <b>CGC</b> CGA ATC CCA<br>ACC ACC-3' | Site-directed mutagenesis of D238A |
| P3   | 5'-GGT GGT TGG GAT TCG <b>AAA</b> TTC CCC AAC<br>TCG ATG-3' | Site-directed mutagenesis of D238K |
| P4   | 5'-CAT CGA GTT GGG GAA <b>TTT</b> CGA ATC CCA<br>ACC ACC-3' | Site-directed mutagenesis of D238K |
| P5   | 5'-GGT GGT TGG GAT TCG <b>GAA</b> TTC CCC AAC<br>TCG ATG-3' | Site-directed mutagenesis of D238E |
| P6   | 5'-CAT CGA GTT GGG GAA <b>TTC</b> CGA ATC CCA<br>ACC ACC-3' | Site-directed mutagenesis of D238E |
| P7   | 5'-GGT GGT TGG GAT TCG <b>AAC</b> TTC CCC AAC<br>TCG ATG-3' | Site-directed mutagenesis of D238N |
| P8   | 5'-CAT CGA GTT GGG GAA <b>GTT</b> CGA ATC CCA<br>ACC ACC-3' | Site-directed mutagenesis of D238N |
| P9   | 5'-GGT GGT TGG GAT TCG <b>GTG</b> TTC CCC AAC<br>TCG ATG-3' | Site-directed mutagenesis of D238V |
| P10  | 5'-CAT CGA GTT GGG GAA <b>CAC</b> CGA ATC CCA<br>ACC ACC-3' | Site-directed mutagenesis of D238V |
| P11  | 5'-GGT GGT TGG GAT TCG <b>NNS</b> TTC CCC AAC<br>TCG ATG-3' | Saturation mutagenesis of D238     |
| P12  | 5'-CAT CGA GTT GGG GAA <b>SNN</b> CGA ATC CCA<br>ACC ACC-3' | Saturation mutagenesis of D238     |

Sequences shown in bold type are mutation points.

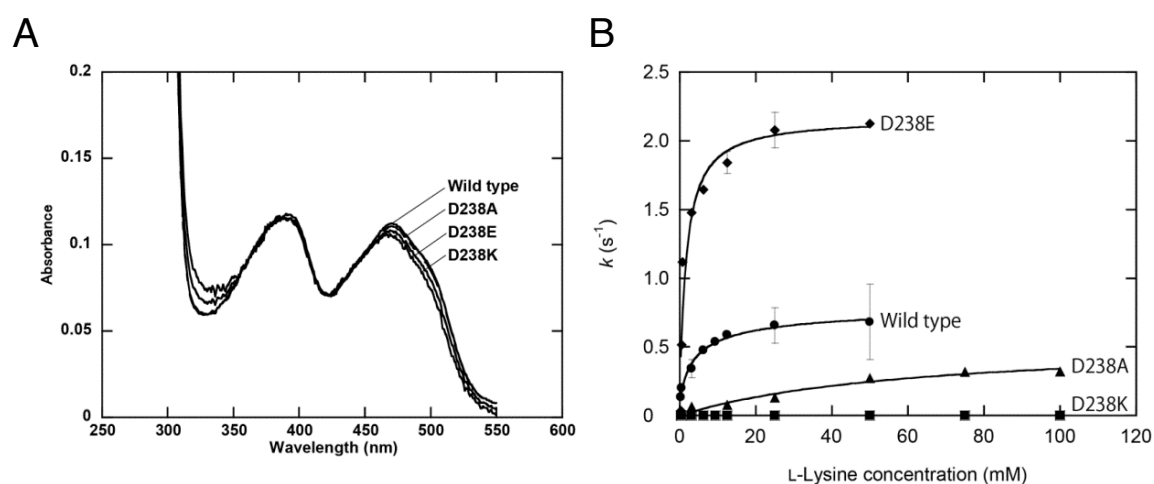

**Fig. S1.** (A) UV-visible absorbance spectra and kinetics of L-lysine oxidation by the wild-type enzyme (●) and D238A (▲), D238E (◆), and D238K (■) mutants.
